# Supplementary material
Source: Springer Nature journal article supplement (https://www.springermedizin.de/resource/supplementary/13058_2010_9477_MOESM7_ESM.pdf/9702238)

**Tn-MUC1a  
peptide  
array**

**Tn-glycoforms**

**Core-3-glycoforms**

**STn-glycoforms**

(-) enzyme

(+)  $\beta$ 1-3GlcNAcT-VI

(+) hST6GalNAc-I

**A**

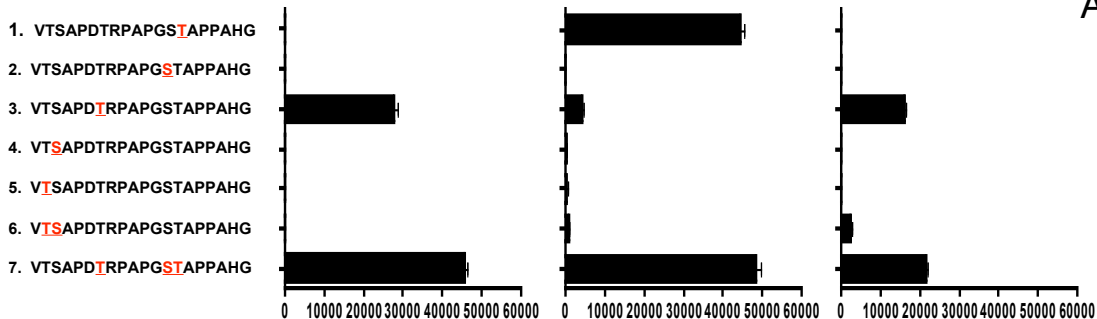

**B**

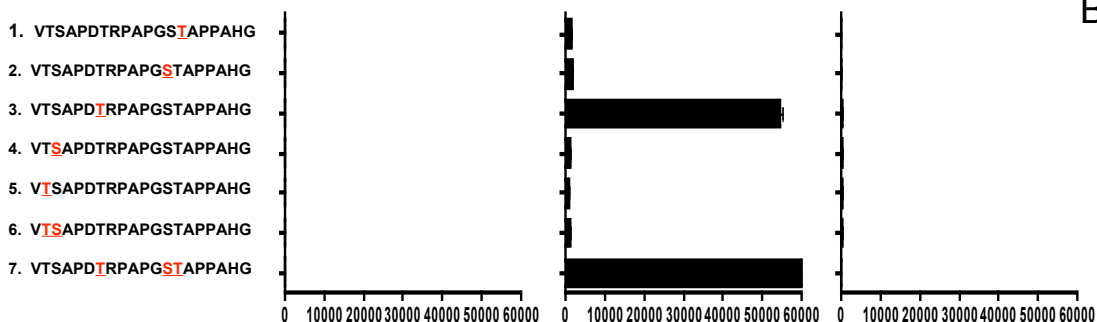

**C**

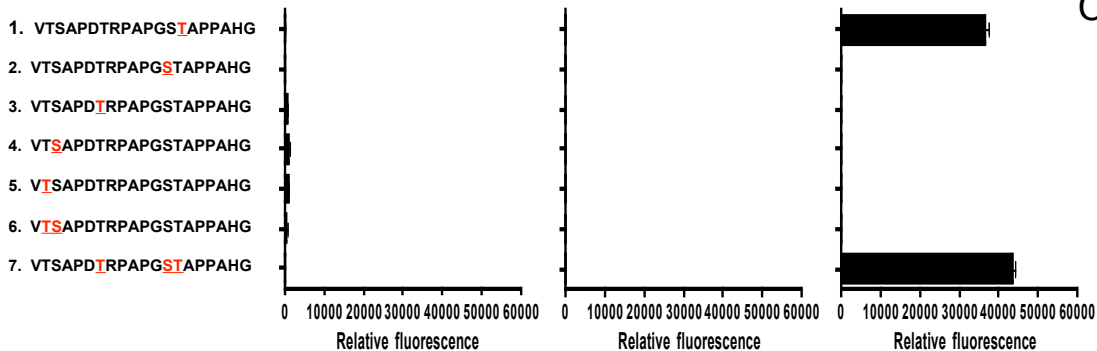

Supplement: MOESM7 [file 9702238]
